# Supplementary material for: Metagenomic Investigation of Plasma in Individuals with ME/CFS Highlights the Importance of Technical Controls to Elucidate Contamination and Batch Effects
Source: PLoS One. 2016 Nov 2;11(11):e0165691. doi: 10.1371/journal.pone.0165691 (PMC5091812; doi:10.1371/journal.pone.0165691)
Supplement: S5 Table — (XLSX) [file pone.0165691.s007.xlsx]

## Sheet: Sheet1
Viral Genus	Mean [StDev] Raw Reads CFS	Mean [StDev] Raw Reads ADCLS	Mean [STDev] Raw Reads Lupus	Mean [STDev] Raw Reads Healthy	Mean [STDev] Raw Reads Batch 1	Mean [STDev] Raw Reads Batch 1	Mean [STDev] Raw Reads Batch 3	Study Group P	Sequencing Batch P	Only Study Group P<0.05	Study Group P<0.005	Sequencing Batch P<0.005	Both<0.005
Betabaculovirus	3925.81 [10111.77]	96 [308.73]	962.62 [3290.28]	1747.82 [3199.24]	23.11 [19.43]	19.96 [18]	6375.42 [9979.72]	6.71655e-09	7.76438e-36	0	1	1	1
Gammaretrovirus	126.16 [479.35]	9.87 [24.81]	9.38 [17.92]	329.88 [1070.04]	2.71 [5.04]	0 [0]	497.68 [1175.49]	0.0183222	2.30282e-37	0	0	1	0
Orthobunyavirus	32.38 [38.49]	19.13 [25.3]	18.54 [24.87]	32.21 [53.01]	12.06 [12.06]	11.71 [9.92]	61.58 [57.65]	1	0.00617315	0	0	0	0
Polyomavirus	0.13 [0.49]	3.53 [13.14]	0 [0]	49.03 [284.48]	0.06 [0.34]	0.07 [0.38]	55.48 [297.74]	1	1	0	0	0	0
Lambda like viruses	3.75 [2.68]	5.33 [3.48]	4.08 [4.42]	42.29 [213.72]	#N/A	#N/A	#N/A	1	1	0	0	0	0
T7 like viruses	2.31 [9.76]	0.13 [0.52]	0 [0]	5.53 [31.54]	#N/A	#N/A	#N/A	1	0.158049	0	0	0	0
Alphabaculovirus	2.19 [2.15]	2 [1.31]	4.31 [4.37]	2.03 [1.82]	3.03 [2.51]	1.57 [1.5]	2.42 [2.9]	1	1	0	0	0	0
Closterovirus	0.44 [1.24]	3.33 [8.54]	1.62 [2.79]	0.71 [1.57]	2.51 [5.86]	0.75 [1.51]	0 [0]	0.585879	0.0381554	0	0	0	0
Cyprinivirus	2.19 [6.25]	0.93 [3.1]	0.46 [0.97]	2.12 [5.78]	0.37 [0.84]	0.29 [0.66]	4.55 [8.37]	1	0.0122806	0	0	0	0
Bcep781 like virus	0 [0]	0 [0]	0 [0]	4.09 [23.49]	#N/A	#N/A	#N/A	1	1	0	0	0	0
Inovirus	0.53 [0.72]	0.4 [0.63]	0.31 [0.63]	1.38 [5.09]	0.31 [0.58]	0.36 [0.62]	1.71 [5.29]	1	0.297945	0	0	0	0
Metapneumovirus	0 [0]	0 [0]	0 [0]	0 [0]	0 [0]	0 [0]	0 [0]	NaN	NaN	0	0	0	0
Mastadenovirus	0.09 [0.39]	1 [3.36]	1 [1.73]	0.24 [0.65]	0.97 [2.43]	0.07 [0.38]	0.1 [0.4]	1	0.496969	0	0	0	0
Epsilon15-like viruses	1.25 [4.44]	0.53 [0.92]	0.46 [1.2]	0.06 [0.34]	0.43 [0.81]	0.21 [0.83]	1.13 [4.52]	1	1	0	0	0	0
Gamma papillomavirus	0 [0]	3.53 [13.68]	0 [0]	0 [0]	#N/A	#N/A	#N/A	NaN	NaN	0	0	0	0
P1-like viruses	0.16 [0.51]	0.07 [0.26]	0 [0]	0.24 [0.82]	0.03 [0.17]	0.04 [0.19]	0.39 [0.95]	1	1	0	0	0	0
Varicellovirus	0.25 [1.41]	0 [0]	0 [0]	0.03 [0.17]	0 [0]	0 [0]	0.29 [1.44]	1	1	0	0	0	0
T1-like viruses	0.16 [0.88]	0 [0]	0 [0]	0.03 [0.17]	0 [0]	0.04 [0.19]	0.16 [0.9]	1	1	0	0	0	0
Whispovirus	0 [0]	0 [0]	0 [0]	0.12 [0.69]	0 [0]	0 [0]	0.13 [0.72]	1	1	0	0	0	0
phiKZ-like viruses	0.06 [0.35]	0 [0]	0 [0]	0.03 [0.17]	0 [0]	0 [0]	0.1 [0.4]	1	1	0	0	0	0
Phaeovirus	0 [0]	0.13 [0.52]	0 [0]	0 [0]	0.06 [0.34]	0 [0]	0 [0]	1	1	0	0	0	0
Betaretrovirus	0 [0]	0 [0]	0 [0]	0 [0]	0 [0]	0 [0]	0 [0]	NaN	NaN	0	0	0	0
Chlorovirus	0.03 [0.18]	0 [0]	0 [0]	0.03 [0.17]	0 [0]	0 [0]	0.06 [0.25]	1	1	0	0	0	0
Iltovirus	0 [0]	0 [0]	0 [0]	0.03 [0.17]	0 [0]	0 [0]	0.03 [0.18]	1	1	0	0	0	0
Rubulavirus	0 [0]	0 [0]	0 [0]	0.03 [0.17]	0 [0]	0 [0]	0.03 [0.18]	1	1	0	0	0	0
Coccolithovirus	0.03 [0.18]	0 [0]	0 [0]	0 [0]	0.03 [0.17]	0 [0]	0 [0]	1	1	0	0	0	0
Prymnesiovirus	0.03 [0.18]	0 [0]	0 [0]	0 [0]	0 [0]	0 [0]	0.03 [0.18]	NaN	NaN	0	0	0	0
T4-like viruses	0 [0]	0 [0]	0 [0]	0 [0]	0 [0]	0 [0]	0 [0]	NaN	NaN	0	0	0	0
Alfamovirus	0 [0]	0 [0]	0 [0]	0.03 [0.17]	0 [0]	0.04 [0.19]	0 [0]	1	1	0	0	0	0
Carlavirus	0 [0]	0 [0]	0 [0]	0.03 [0.17]	0 [0]	0.04 [0.19]	0 [0]	1	1	0	0	0	0
Macavirus	0 [0]	0 [0]	0 [0]	0.03 [0.17]	0 [0]	0 [0]	0.03 [0.18]	1	1	0	0	0	0
